# Supplementary material for: Development of a novel theory of pressure-induced nucleation in supercritical carbon dioxide
Source: Royal Society of Chemistry journal article supplement (doi:10.1039/d2ce00187j), 2022-01-01
Supplement: d2ce00187j1.pdf [file d2ce00187j1.pdf]

## Supporting information

# Development of a novel theory of pressure-induced nucleation in supercritical carbon dioxide

Qi-Bo Wang, Qin-Qin Xu\*, Jian-Zhong Yin, Hong-Yue Zhu, Bao-Lin Liu,  
Ming-Zhe Yang

*State Key Laboratory of Fine Chemicals, School of Chemical Engineering,*

*Dalian University of Technology, Dalian 116024, China*

Table S1 Data of  $\text{MoO}_2(\text{acac})_2$  mole fraction  $y_1$  in  $\text{scCO}_2$

| Temperature<br>(°C) | Pressure<br>(MPa) | Density of $\text{scCO}_2$<br>( $\text{kg}\cdot\text{m}^{-3}$ ) | $y_1 \times 10^4$ |
|---------------------|-------------------|-----------------------------------------------------------------|-------------------|
| 40                  | 7.4               | 233.38                                                          | 1.818             |
|                     | 10.0              | 631.74                                                          | 0.809             |
|                     | 12.0              | 719.38                                                          | 1.033             |
|                     | 14.4              | 764.47                                                          | 1.236             |
|                     | 16.0              | 795.91                                                          | 1.315             |
|                     | 18.0              | 820.39                                                          | 1.485             |
|                     | 20.0              | 840.61                                                          | 1.604             |
| 50                  | 7.4               | 188.78                                                          | 1.420             |
|                     | 10.6              | 460.74                                                          | 1.350             |
|                     | 12.0              | 587.07                                                          | 2.026             |
|                     | 14.0              | 673.7                                                           | 2.535             |
|                     | 16.0              | 723.27                                                          | 2.894             |
|                     | 18.0              | 758.11                                                          | 3.754             |
|                     | 20.0              | 785.16                                                          | 4.172             |
| 60                  | 7.4               | 168.75                                                          | 1.316             |
|                     | 10.0              | 290.81                                                          | 1.821             |
|                     | 12.0              | 436.26                                                          | 2.006             |
|                     | 14.0              | 563.09                                                          | 2.830             |
|                     | 16.0              | 638.84                                                          | 3.761             |
|                     | 18.0              | 688.34                                                          | 4.128             |
|                     | 20.0              | 724.63                                                          | 4.829             |

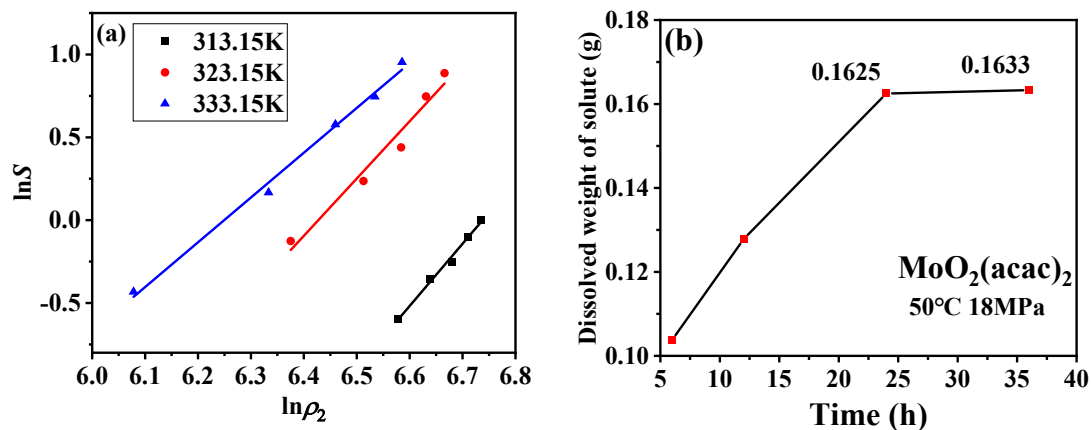

Fig. S1 (a) Linear relationships between the logarithms solubility and the logarithms density of  $\text{scCO}_2$  at various temperatures. (b) Relationships between dissolution time and dissolved weight of solute at  $50^\circ\text{C}$ , 18.0 MPa.

Linear relationships between the logarithms solubility and the logarithms density of  $\text{scCO}_2$  were obtained at various temperatures when  $p \geq 12.0$  MPa, as shown in Fig.S1(a). The solubility at 323.15 K and 333.15 K was higher than that at 313.15 K, which indicated that temperature played a dominant factor in solubility at high density.

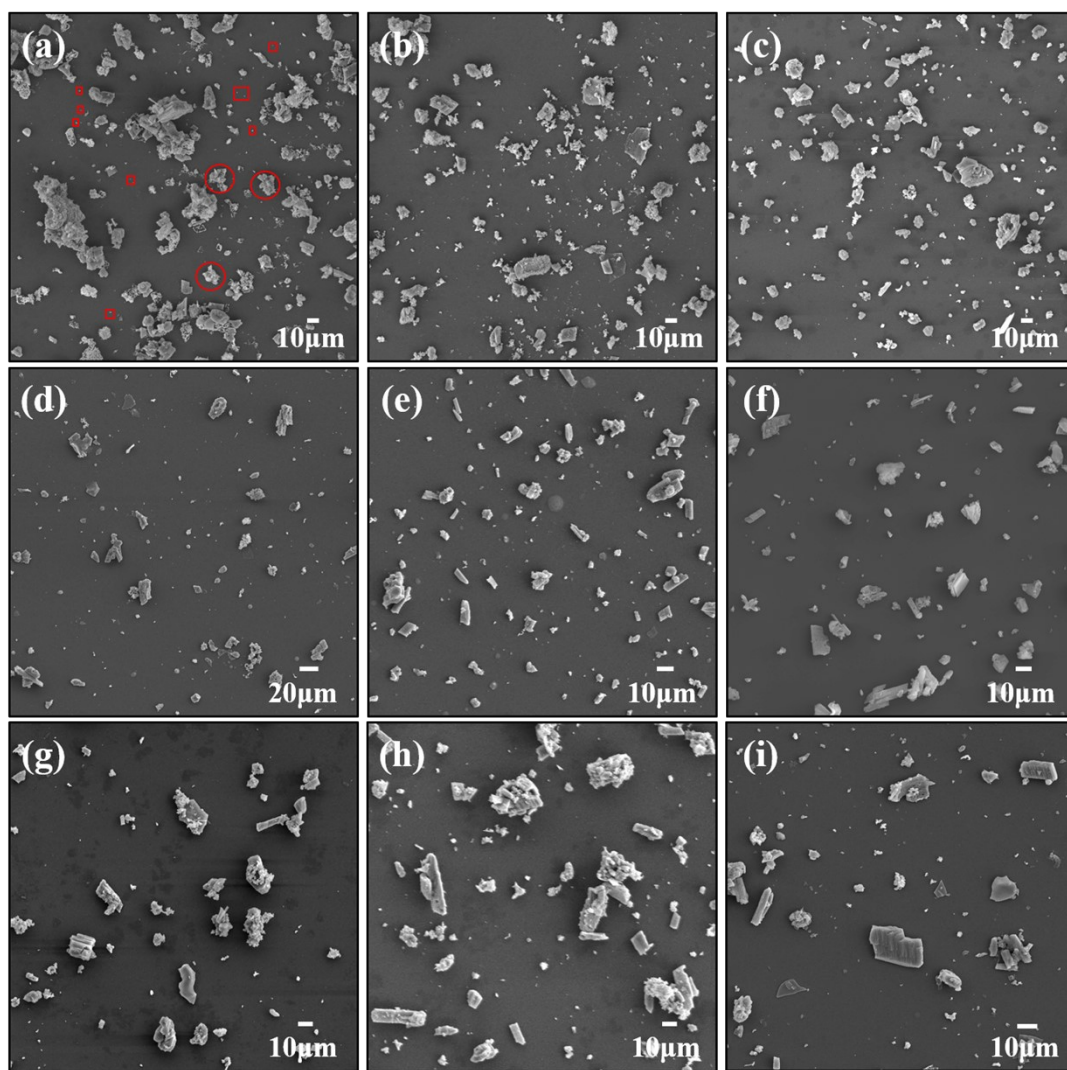

Fig.S2 SEM images of  $\text{MoO}_2(\text{acac})_2$  particles obtained by PI-SCPN process at  $p=20.0$  MPa, various temperatures and supersaturation. (a)  $T=333.15$  K,  $\sigma_c=12$ ; (b)  $T=333.15$  K,  $\sigma_c=8$ ; (c)  $T=333.15$  K,  $\sigma_c=5$ ; (d)  $T=323.15$  K,  $\sigma_c=12$ ; (e)  $T=323.15$  K,  $\sigma_c=8$ ; (f)  $T=323.15$  K,  $\sigma_c=5$ ; (g)  $T=313.15$  K,  $\sigma_c=12$ ; (h)  $T=313.15$  K,  $\sigma_c=8$ ; (i)  $T=313.15$  K,  $\sigma_c=5$ .

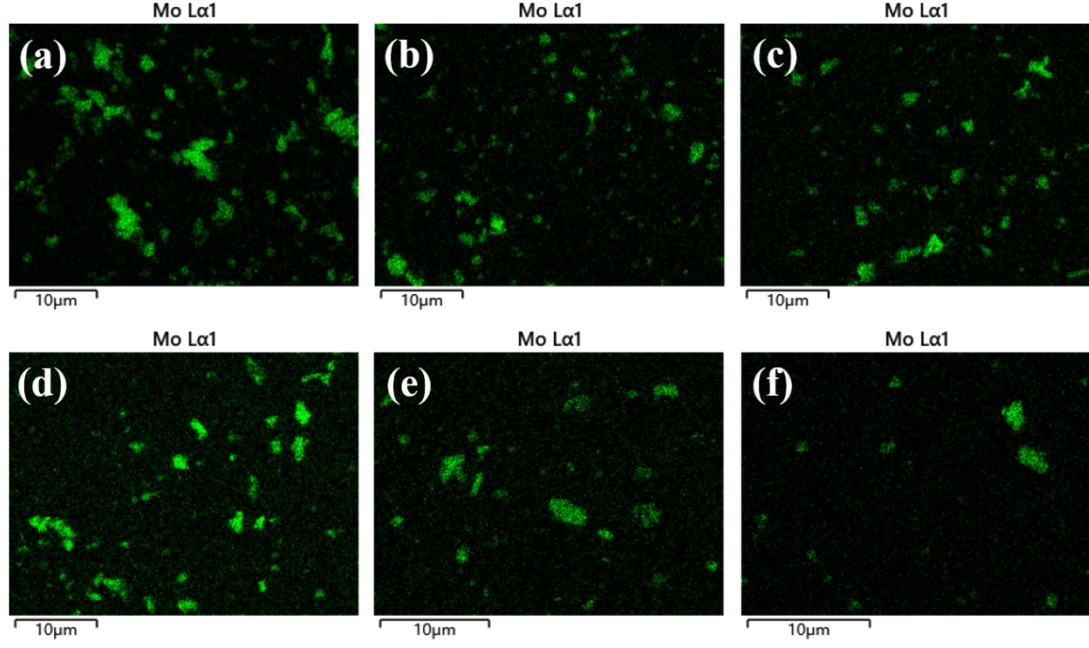

Fig. S3 EDS images of some samples (a) Sample 1,  $T=333.15$  K,  $p=20.0$  MPa,  $\sigma=12$ ; (b) Sample 3,  $T=333.15$  K,  $p=20.0$  MPa,  $\sigma=5$ ; (c) Sample 6,  $T=323.15$  K,  $p=20.0$  MPa,  $\sigma=5$ ; (d) Sample 7,  $T=313.15$  K,  $p=20.0$  MPa,  $\sigma=12$ ; (e) Sample 9,  $T=313.15$  K,  $p=20.0$  MPa,  $\sigma=5$ ; (f) Sample 12,  $T=323.15$  K,  $p=14.0$  MPa,  $\sigma=5$ .

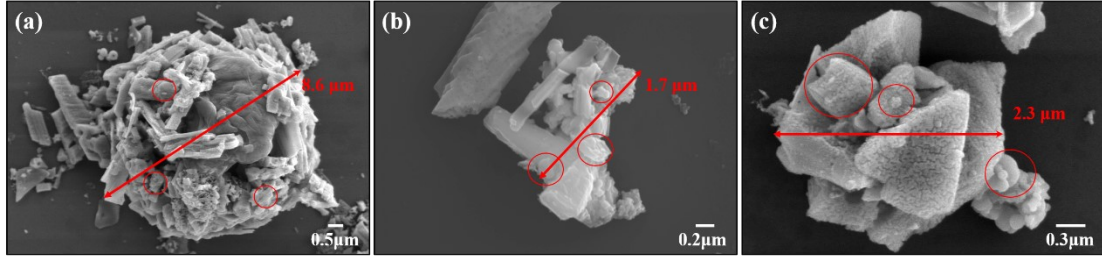

Fig. S4 SEM images of agglomerated particles at various operating conditions (a)  $T=333.15$  K,  $p=20.0$  MPa,  $\sigma=12$ ; (b)  $T=323.15$  K,  $p=20.0$  MPa,  $\sigma=5$ ; (c)  $T=313.15$  K,  $p=20.0$  MPa,  $\sigma=12$ .

In Fig. S4, the size of the agglomerated structure was significantly larger than that of a cluster. The red circle contained at least one cluster.

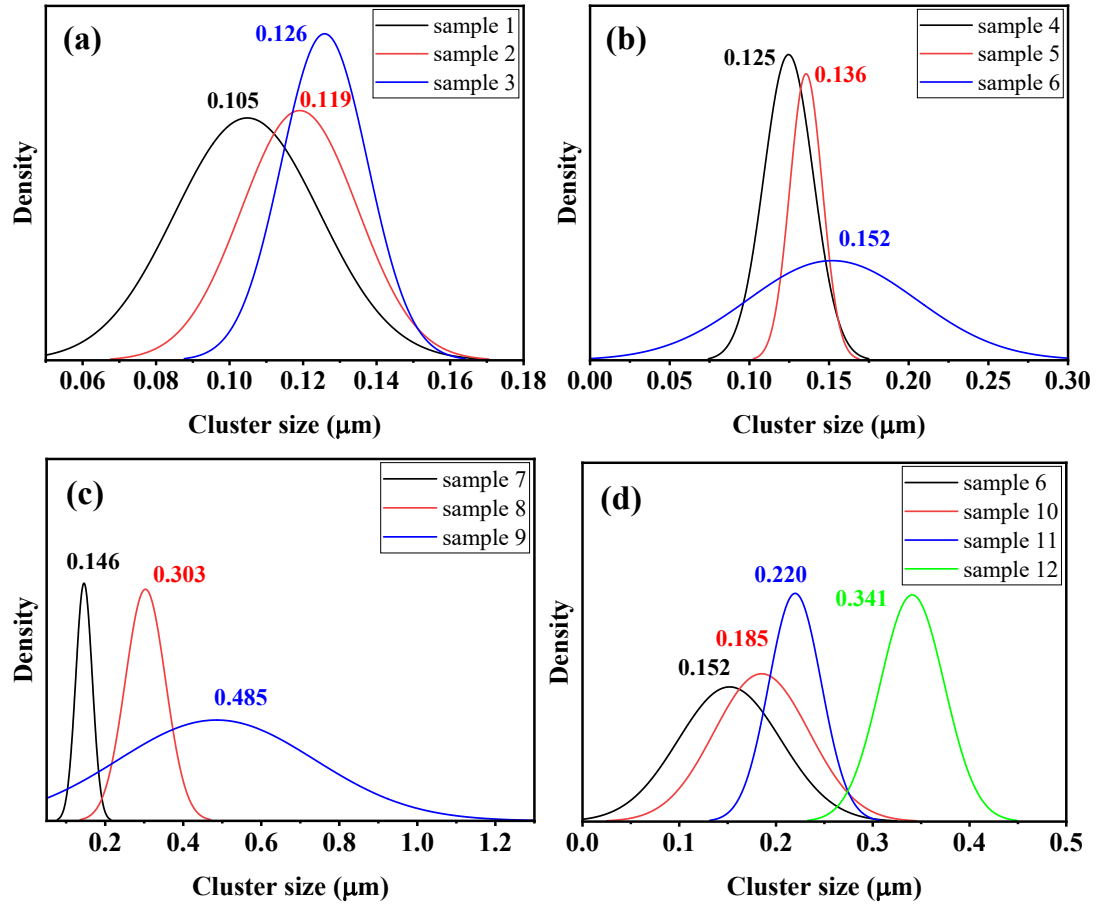

Fig. S5 Statistical distribution of cluster size  $r$  at various conditions. (a) samples 1, 2, and 3; (b) samples 4, 5, and 6; (c) samples 7, 8, and 9; (d) samples 6, 10, 11, and 12.

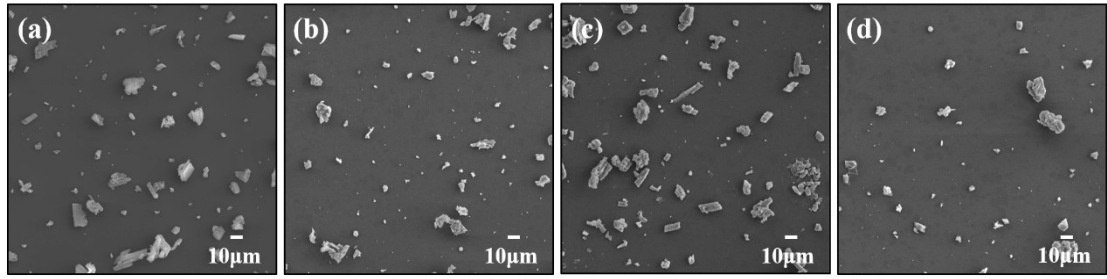

Fig. S6 SEM image of Cluster at  $T=323.15$  K,  $\sigma_c=5$  and various pressure;

(a)  $p=20.0$  MPa; (b)  $p=18.0$  MPa; (c)  $p=16.0$  MPa; (d)  $p=14.0$  MPa.
